# Supplementary material for: Evidence for the Concerted Evolution between Short Linear Protein Motifs and Their Flanking Regions
Source: PLOS journal article supplement (doi:10.1371/journal.pone.0006052), 2009-07-07
Supplement: S3 (10.1371/journal.pone.0006052.s003) [file journal.pone.0006052.s003]

**Table S2.** Mean and standard deviation of the correlation between  $P_{LM}$  and  $A_{LM}$  frequency profiles

| protein class | module class | number <sup>a</sup> | <i>locCons</i> corr |       | <i>globCons</i> corr |       |
|---------------|--------------|---------------------|---------------------|-------|----------------------|-------|
|               |              |                     | mean                | stdev | mean                 | stdev |
| DIS           | DIS          | 17                  | 0.20                | 0.22  | 0.22                 | 0.17  |
|               | GLOB         | 4                   | 0.34                | 0.28  | 0.22                 | 0.20  |
| GLOB          | DIS          | 10                  | 0.34                | 0.20  | 0.21                 | 0.18  |
|               | GLOB         | 7                   | 0.23                | 0.24  | 0.12                 | 0.22  |
| MIXED         | DIS          | 9                   | 0.11                | 0.14  | 0.02                 | 0.10  |
|               | GLOB         | 6                   | 0.12                | 0.19  | 0.10                 | 0.20  |

Spearman correlation coefficient calculated between the  $P_{LM}$  and  $A_{LM}$  frequency profiles of each instance. Correlation of the frequency profiles of  $IUP_{diff}$  versus *locCons* and  $IUP_{diff}$  versus *globCons* are indicated as *locCons* corr and *globCons* corr respectively.

<sup>a</sup> number of instances per structural class
